# Supplementary material
Source: PubMed Central journal article supplement (PMC5995330)
Supplement: NIHMS966183-supplement-supplement_1.pdf [file NIHMS966183-supplement-supplement_1.pdf]

**eTable 1.** The 5-Component Fried Frailty Scoring Criteria\*

| Fried frailty score | Explanation                                                                                                                                                                                                                                                                                                                                                                                                                                                                                                                                                                                                                                                                 |
|---------------------|-----------------------------------------------------------------------------------------------------------------------------------------------------------------------------------------------------------------------------------------------------------------------------------------------------------------------------------------------------------------------------------------------------------------------------------------------------------------------------------------------------------------------------------------------------------------------------------------------------------------------------------------------------------------------------|
| Shrinking           | Self-reported unintentional weight loss $\geq 10$ lb in the last year.                                                                                                                                                                                                                                                                                                                                                                                                                                                                                                                                                                                                      |
| Weakness            | Measured by having the patient squeeze a hand-held dynamometer (Jamar). Three serial tests of maximum grip strength with the dominant hand were performed, and a mean of the 3 values was adjusted by sex and BMI. Men met the criteria for weakness if their BMI and grip strength were $\leq 24$ kg/m <sup>2</sup> and $\leq 29$ kg of force; 24.1 to 26 and $\leq 30$ kg; 26.1 to 28 and $\leq 31$ kg; $> 28$ and $\leq 32$ kg, respectively. Women met the criteria for weakness if their BMI and grip strength were $\leq 23$ kg/m <sup>2</sup> and $\leq 17$ kg; 23.1 to 26 and $\leq 17.3$ kg; 26.1 to 29 and $\leq 18$ ; and $> 29$ and $\leq 21$ kg, respectively. |
| Exhaustion          | Measured by responses to questions about effort and motivation. The following 2 statements were used from the modified 10-item Center for Epidemiological Studies-Depression scale: "I felt that everything I did was an effort" and "I could not get going." Subjects were asked, "How often in the last week did you feel this way?" Potential responses were 0 = rarely or none of the time ( $< 1$ day); 1 = some or little of the time (1 to 2 days); 2 = a moderate amount of the time (3 to 4 days); and 3 = most of the time. Subjects answering either statement with a response of 2 or 3 met the criteria for exhaustion.                                        |
| Low activity        | Determined by inquiring about leisure time activities. Physical activities were ascertained for the previous 2 weeks using the short version of the Minnesota Leisure Time Activities Questionnaire, and included frequency and duration. Weekly tasks were converted to equivalent kilocalories of expenditure, and individuals reporting a weekly kilocalorie expenditure below the following criteria were classified as having low physical activity: men, $< 383$ kcal/wk; women, $< 270$ kcal/wk.                                                                                                                                                                     |
| Slow walking speed  | Measured by the speed at which a patient walks 15 feet. The final time was taken by averaging 3 trials of walking the 15 feet at a normal pace. Men met the slowness criteria if height and walk time were $\leq 173$ cm and $\geq 7$ seconds, or $> 173$ cm and $\geq 6$ seconds, respectively. Women met criteria if height and walk time were $\leq 159$ cm and $\geq 7$ seconds, or $> 159$ cm and $\geq 6$ seconds, respectively.                                                                                                                                                                                                                                      |

\*Each domain yields a dichotomous score of 0 or 1, based on the criteria provided. Score classified patients as not frail (0 to 1), intermediate frail (2 to 3), and frail (4 to 5).
